# Supplementary material for: A review of guidelines for cardiac rehabilitation exercise programmes: Is there an international consensus?
Source: Oxford University Press journal article supplement (doi:10.1177/2047487316657669), 2016-06-29
Supplement: suppl-table1.pdf [file suppl-table1.pdf]

**Supplementary Table 1: Definition of phases of cardiac rehabilitation internationally**

| Country                                    | Inpatient                                                                                                                                    | Outpatient                                                                                                                                                                                                                                                               | Ongoing maintenance                                                                                                                                                                                                                            |
|--------------------------------------------|----------------------------------------------------------------------------------------------------------------------------------------------|--------------------------------------------------------------------------------------------------------------------------------------------------------------------------------------------------------------------------------------------------------------------------|------------------------------------------------------------------------------------------------------------------------------------------------------------------------------------------------------------------------------------------------|
| <b>Countries with three-phase programs</b> |                                                                                                                                              |                                                                                                                                                                                                                                                                          |                                                                                                                                                                                                                                                |
| <b>Australia<sup>1</sup></b>               | <b>Phase I</b><br>Mobilisation<br>Education for resumption of ADLs                                                                           | <b>Phase II</b><br>Commences on discharge from hospital<br>Supervised group or individual program in hospital, community health centre or general medical practice                                                                                                       | <b>Phase III</b><br>Ongoing maintenance of healthy lifestyle changes                                                                                                                                                                           |
| <b>Belgium<sup>2</sup></b>                 | <b>Phase I</b><br>Acute/subacute rehabilitation phase<br>In-hospital mobilisation, education and referral (first days/weeks after admission) | <b>Phase II</b><br>Convalescence phase<br>Reconditioning & early lifestyle modification                                                                                                                                                                                  | <b>Phase III</b><br>Long-term maintenance program                                                                                                                                                                                              |
| <b>Europe<sup>3-5</sup></b>                | <b>Phase I</b><br>Inpatient hospital period, lasting 1-2 weeks                                                                               | <b>Phase II</b><br>Early post-discharge program<br>Includes structured exercise, educational activities, & encouragement of lifestyle changes<br>High risk patients may require an initial hospital setting                                                              | <b>Phase III</b><br>Long-term maintenance program with less intense supervision                                                                                                                                                                |
| <b>France<sup>6,7</sup></b>                | <b>Phase I</b><br>Acute hospital stage<br>Early mobilisation                                                                                 | <b>Phase II</b><br>Post-discharge program<br>May be provided as an inpatient (with complete weekday hospitalisation) or outpatient hospital program, or in a cardiac rehabilitation centre<br>Reconditioning, lifestyle modification & promotion of return to employment | <b>Phase III</b><br>Long term maintenance of lifestyle changes<br>Options include community-based Heart Health clubs                                                                                                                           |
| <b>Germany<sup>8</sup></b>                 | <b>Phase I</b><br>Acute hospital period, incorporating physical therapy & mobilisation                                                       | <b>Phase II</b><br>Post-discharge rehabilitation<br>May be provided as inpatient or outpatient (5 hours/day) rehabilitation in medical practices or rehabilitation hospital<br>Incorporates exercise, education & psychological elements                                 | <b>Phase III</b><br>Maintenance of lifestyle changes<br>Intensive aftercare programs, funded by retirement insurance, aim to re-integrate patients into employment<br>Community heart groups are instructed by exercise therapists and include |

|                                                  |                                                                                                                                 |                                                                                                                                                                                                                                                               |                                                                                                                                                                                                                                                                           |                                                                                                                                                                   |
|--------------------------------------------------|---------------------------------------------------------------------------------------------------------------------------------|---------------------------------------------------------------------------------------------------------------------------------------------------------------------------------------------------------------------------------------------------------------|---------------------------------------------------------------------------------------------------------------------------------------------------------------------------------------------------------------------------------------------------------------------------|-------------------------------------------------------------------------------------------------------------------------------------------------------------------|
|                                                  |                                                                                                                                 |                                                                                                                                                                                                                                                               |                                                                                                                                                                                                                                                                           | exercise, education & psychosocial elements                                                                                                                       |
| <b>Japan<sup>9</sup></b>                         | <b>Phase I</b><br>Acute phase (in ICU) Focus on functional mobilisation and information for return to daily life                | <b>Phase II</b><br>Recovery phase, incorporating both time on general ward & in a supervised program at a rehabilitation centre<br>Program focused on returning to society & establishing lifestyle changes<br>Costs are covered by National Health Insurance | <b>Phase III</b><br>From month 6 onwards<br>Located at community exercise centre with focus on prevention of recurrence & maintaining better lifestyle                                                                                                                    |                                                                                                                                                                   |
| <b>New Zealand<sup>10</sup></b>                  | <b>Phase I</b><br>Early mobilisation and education                                                                              | <b>Phase II</b><br>Begins as soon as possible after discharge<br>Medically supervised program in either hospital-based, community care or home-based setting<br>Includes exercise & education components                                                      | <b>Phase III</b><br>Long-term maintenance of lifestyle changes<br>Primarily community-based                                                                                                                                                                               |                                                                                                                                                                   |
| <b>Netherlands<sup>11,12</sup></b>               | <b>Preoperative phase</b><br>(if applicable)<br>Inspiratory muscle training & exercise to preserve/improve physical fitness     | <b>Phase I</b><br>Clinical phase, relative rest on ICU followed by functional mobilisation for resumption of ADLs                                                                                                                                             | <b>Phase II</b><br>Commences as soon as possible after discharge<br>Includes both exercise & education components<br>Supervised program which may be conducted on an outpatient basis at a hospital, or at a rehabilitation centre or primary care physiotherapy practice | <b>Phase III</b><br>Post-rehabilitation phase<br>Primary care exercise program recommended for those who are not yet able to maintain physically active lifestyle |
| <b>United States<sup>13,14</sup></b>             | <b>Phase I</b><br>Treatment<br>Initiation of secondary prevention treatments (e.g. supervised early mobilisation and education) | <b>Phase II</b><br>Commences on discharge from hospital<br>Includes supervised exercise and other lifestyle modification interventions<br>Programs may be hospital-based or located at outpatient facilities                                                  | <b>Phase III</b><br>Long term maintenance of lifestyle changes with periodic monitoring of symptoms, risk factors and medications by medical professionals                                                                                                                |                                                                                                                                                                   |
| <b>World Health Organisation<sup>15,16</sup></b> | <b>Phase I</b><br>Acute phase                                                                                                   | <b>Phase II</b><br>Reconditioning phase<br>Group program in community centre (basic), hospital (intermediate), or cardiac rehabilitation centre at a major                                                                                                    | <b>Phase III</b><br>Maintenance phase                                                                                                                                                                                                                                     |                                                                                                                                                                   |

---

medical centre (advanced)

---

**Countries with four-phase programs**

---

|                             |                                                                                                                                                                                                     |                                                                                                                                                                                |                                                                                                                                                                                                                                                                                                         |                                                                                                                                                                                                                                                          |
|-----------------------------|-----------------------------------------------------------------------------------------------------------------------------------------------------------------------------------------------------|--------------------------------------------------------------------------------------------------------------------------------------------------------------------------------|---------------------------------------------------------------------------------------------------------------------------------------------------------------------------------------------------------------------------------------------------------------------------------------------------------|----------------------------------------------------------------------------------------------------------------------------------------------------------------------------------------------------------------------------------------------------------|
| <b>Austria<sup>17</sup></b> | <b>Phase I</b><br>Acute hospital stage<br>Early mobilisation & preparation for further rehab                                                                                                        | <b>Phase II</b><br>Supervised program conducted at a cardiac rehabilitation clinic (on either an inpatient or outpatient basis)                                                | <b>Phase III</b><br>Supervised outpatient cardiac rehabilitation<br>Reinforce results achieved in Phase II                                                                                                                                                                                              | <b>Phase IV</b><br>Long term cardiac rehabilitation<br>Includes heart groups, sports clubs, home training                                                                                                                                                |
| <b>Canada<sup>18</sup></b>  | <b>Phase I</b><br>Immediately post-MI or prior to planned cardiovascular intervention<br>Focus on education about diagnosis, CVD risk factors, symptom management, medications and early ambulation | <b>Phase II/III</b><br>Post-discharge program<br>Provided by hospital or community-based providers in a variety of models, including on-site supervised sessions or home-based |                                                                                                                                                                                                                                                                                                         | <b>Phase IV</b><br>Long-term maintenance program<br>Options include continuation in a structured program through hospital or community-based provider                                                                                                    |
| <b>England<sup>19</sup></b> | <b>Phase I</b><br>Prior to discharge from hospital<br>Includes assessment of cardiac rehabilitation needs & initial lifestyle advice                                                                | <b>Phase II</b><br>Early post discharge period<br>Includes comprehensive assessment of cardiac risk, & continued provision of lifestyle advice & psychological interventions   | <b>Phase III</b><br>Begins from 4 weeks after an acute cardiac event<br>Includes structured exercise sessions to meet the assessed needs of individual patients & continued provision of lifestyle advice<br>Typically conducted as group sessions but individual or home-based programs may be offered | <b>Phase IV</b><br>Long term maintenance<br>Options include cardiac support group or follow-up through primary care<br>Referral to specialist cardiac, behavioural (e.g. exercise, smoking cessation) or psychological services as clinically indicated. |
| <b>Ireland<sup>20</sup></b> | <b>Phase I</b><br>In-patient hospital period (average 2-5 days)<br>Support and information, preparation of discharge activity plan                                                                  | <b>Phase II</b><br>Post discharge period prior to commencing formal Phase III program<br>Education & support, begin gradual activity & light-                                  | <b>Phase III</b><br>Includes exercise prescription, education and counselling                                                                                                                                                                                                                           | <b>Phase IV</b><br>Long term maintenance of lifestyle changes<br>Options include community-based exercise programs run by qualified Phase IV gym instructors                                                                                             |

---

intensity exercise once stable

|                                      |                                                                                                                                        |                                                                                                                                                                                                     |                                                                                                                                                                                         |                                                                                                                                       |
|--------------------------------------|----------------------------------------------------------------------------------------------------------------------------------------|-----------------------------------------------------------------------------------------------------------------------------------------------------------------------------------------------------|-----------------------------------------------------------------------------------------------------------------------------------------------------------------------------------------|---------------------------------------------------------------------------------------------------------------------------------------|
| <b>Northern Ireland<sup>21</sup></b> | <b>Phase I</b><br>Mobilisation, education and resumption of ADLs                                                                       | <b>Phase II</b><br>Immediate post-discharge period<br>Reinforcement of Phase I information                                                                                                          | <b>Phase III</b><br>Includes exercise & education components<br>Supervised program provided in a hospital or community-based setting                                                    | <b>Phase IV</b><br>Long-term maintenance of lifestyle changes                                                                         |
| <b>Scotland<sup>22</sup></b>         | <b>Phase I</b><br>Mobilisation & initial education                                                                                     | <b>Phase II</b><br>Early post-discharge period                                                                                                                                                      | <b>Phase III</b><br>Intermediate outpatient stage<br>Structured group program in community or home-based setting, with high risk patients attending a hospital-based program            | <b>Phase IV</b><br>Long term maintenance of lifestyle changes                                                                         |
| <b>South America<sup>23</sup></b>    | <b>Phase I</b><br>From 48 hours after the acute event until the time of hospital discharge<br>Aim to prevent loss of physical capacity | <b>Phase II</b><br>Post-discharge rehabilitation, approximately 3 months<br>Programs performed in gym or rehabilitation centre<br>Aims to improve functional capacity & achieve risk factor changes | <b>Phase III</b><br>Early maintenance phase (still some supervision)<br>3-5 weekly sessions over 3-6 months                                                                             | <b>Phase IV</b><br>Late maintenance phase<br>Ongoing and essentially unsupervised                                                     |
| <b>United Kingdom<sup>24</sup></b>   | <b>Phase I</b><br>Education and advice on lifestyle changes                                                                            | <b>Phase II</b><br>Home convalescence<br>Encouragement to increase physical activities                                                                                                              | <b>Phase III</b><br>Commences 2-6 weeks following discharge<br>Includes education & exercise components<br>Supervised group rehabilitation in hospital, community or home-based program | <b>Phase IV</b><br>Long-term maintenance of lifestyle changes<br>Options include programs in fitness centres with trained instructors |

---

**Wales**<sup>25,26</sup>

**Phase I**

Early contact while still in hospital, referral to cardiac rehabilitation within 2 days of diagnosis

**Phase II**

Following discharge, contacted within 7 days after discharge to offer advice and support and make arrangements for ongoing management

**Phase III**

Structured program in choice of hospital or community facility or home-based program

**Phase IV**

Long term maintenance of lifestyle changes

---

Abbreviations: ADLs, activities of daily living; ICU, intensive care unit; MI, myocardial infarction; CVD, cardiovascular disease.

## References

1. National Heart Foundation of Australia and Australian Cardiac Rehabilitation Association. *Recommended framework for cardiac rehabilitation*. Australia: National Heart Foundation of Australia, <http://www.heartfoundation.org.au/SiteCollectionDocuments/Recommended-framework.pdf> (2004, accessed 11 February 2015).
2. Dendale P, Dereppe H, Sutter JD, et al. Position paper of the Belgian Working Group on Cardiovascular Prevention and Rehabilitation: Cardiovascular rehabilitation. *Acta Cardiol* 2008; 63: 673-81.
3. Bjarnason-Wehrens B, McGee H, Zwisler AD, et al. Cardiac rehabilitation in Europe: Results from the European Cardiac Rehabilitation Inventory Survey. *Eur J Cardiovasc Prev Rehabil* 2010; 17: 410-8.
4. Piepoli MF, Corra U, Benzer W, et al. Secondary prevention through cardiac rehabilitation: From knowledge to implementation. A position paper from the Cardiac Rehabilitation Section of the European Association of Cardiovascular Prevention and Rehabilitation. *Eur J Cardiovasc Prev Rehabil* 2010; 17: 1-17.
5. Humphrey R, Guazzi M and Niebauer J. Cardiac rehabilitation in Europe. *Prog Cardiovasc Dis* 2014; 56: 551-6.
6. Pavy B, Iliou MC, Verges-Patois B, et al. French Society of Cardiology guidelines for cardiac rehabilitation in adults. *Arch Cardiovasc Dis* 2012; 105: 309-28.
7. Beaune J, Delahaye F, Douard H, et al. Readaptation. *French Federation of Cardiology*, <http://www.fedecardio.org/je-suis-cardiaque/readaptation> (Accessed 1 September 2015)
8. Karoff M, Held K and Bjarnason-Wehrens B. Cardiac rehabilitation in Germany. *Eur J Cardiovasc Prev Rehabil* 2007; 14: 18-27.
9. Japanese Circulation Society Joint Working Group. Guidelines for rehabilitation in patients with cardiovascular disease (JCS 2012). *Circ J* 2014; 78: 2022-93.
10. Heart Foundation (New Zealand) and New Zealand Guidelines Group. *Evidence-based best practice guideline: Cardiac rehabilitation*. Wellington: New Zealand Guideline Group, <http://www.health.govt.nz/publication/cardiac-rehabilitation-guideline> (2002, accessed 2 March 2015).
11. Achttien RJ, Staal JB, van der Voort S, et al. Exercise-based cardiac rehabilitation in patients with coronary heart disease: A practice guideline. *Neth Heart J* 2013; 21: 429-38.
12. Royal Dutch Society for Physical Therapy. KNGF clinical practice guideline for physical therapy in patients undergoing cardiac rehabilitation. *Dutch J Phys Ther* 2011; 121: 1-47.
13. Suaya JA, Shepard DS, Normand SL, et al. Use of cardiac rehabilitation by Medicare beneficiaries after myocardial infarction or coronary bypass surgery. *Circulation* 2007; 116: 1653-62.
14. American Association of Cardiovascular and Pulmonary Rehabilitation. *Guidelines for cardiac rehabilitation and secondary prevention programs*. 5th ed. Champaign, IL: Human Kinetics, 2013.
15. World Health Organization Expert Committee. Rehabilitation after cardiovascular diseases, with special emphasis on developing countries. *World Health Organ Tech Rep Ser* 1993; 831: 1-122.

16. Vanhees L, McGee HM, Dugmore LD, et al. A representative study of cardiac rehabilitation activities in European Union member states: The CARINEX survey. *J Cardiopulm Rehabil* 2002; 22: 264-72.
17. Niebauer J, Mayr K, Tschentscher M, et al. Outpatient cardiac rehabilitation: The Austrian model. *Eur J Prev Cardiol* 2013; 20: 468-79.
18. Stone JA, Arthur HM, Suskin N, et al. *Canadian guidelines for cardiac rehabilitation and cardiovascular disease prevention: Translating knowledge into action*. 3rd ed. Winnipeg, Canada: Canadian Association of Cardiac Rehabilitation, 2009.
19. National Health Service (England). *National service framework for coronary heart disease: Modern standards & service models*. London: Department of Health UK, <https://www.gov.uk/government/publications/quality-standards-for-coronary-heart-disease-care> (2000, accessed 3 July 2015).
20. McCreery C, Cradock K, Fallon N, et al. *Cardiac rehabilitation guidelines 2013*. Dublin: Irish Association of Cardiac Rehabilitation, <http://www.iacr.info/about/guidelines/> (2013, accessed 24 March 2015).
21. McVeigh G, Bleakney G, Cupples M, et al. *Guidelines for cardiac rehabilitation in Northern Ireland*. Belfast: Clinical Resource Efficiency Support Team, <http://www.gain-ni.org/index.php/guidelines-for-cardiac-rehabilitation-in-northern-ireland> (2006, accessed 12 March 2015).
22. Scottish Intercollegiate Guidelines Network. *Cardiac rehabilitation: A national clinical guideline*. Edinburgh, Scotland: Scottish Intercollegiate Guidelines Network, <http://www.sign.ac.uk/guidelines/fulltext/57/index.html> (2002, accessed 11 February, 2015).
23. Herdy AH, Lopez-Jimenez F, Terzic CP, et al. South American guidelines for cardiovascular disease prevention and rehabilitation. *Arq Bras Cardiol* 2014; 103: 1-31.
24. Bethell H, Lewin R and Dalal H. Cardiac rehabilitation in the United Kingdom. *Heart* 2009; 95: 271-5.
25. Welsh Assembly Government. *The cardiac disease national service framework for Wales*. Cardiff: Welsh Assembly Government, <http://gov.wales/docs/dhss/publications/090706cardiacNSFen.pdf> (2009, accessed 12 March 2015).
26. Aneurin Bevan Health Board. *Cardiac rehabilitation service protocol*. Caerleon, Wales: Aneurin Bevan Health Board, <http://www.wales.nhs.uk/sitesplus/documents/986/AB%20HB%20CR%20Service%20Protocol%20-%20040211.pdf> (Accessed 22 March 2015).

**Supplementary Table 2.**

|                                                                                     | <b>Patient eligibility</b>                                                                                                                                                                         | <b>Personnel requirements</b>                                                                                                                                                                                                                                         | <b>Patient evaluation prior to program commencement</b>                                                         | <b>Prescription and supervision of exercise</b>                                                                                                                                                                      | <b>Education and psychological interventions</b>                                                                                                                                   | <b>Long-term recommendations</b>                                                                                                                      |
|-------------------------------------------------------------------------------------|----------------------------------------------------------------------------------------------------------------------------------------------------------------------------------------------------|-----------------------------------------------------------------------------------------------------------------------------------------------------------------------------------------------------------------------------------------------------------------------|-----------------------------------------------------------------------------------------------------------------|----------------------------------------------------------------------------------------------------------------------------------------------------------------------------------------------------------------------|------------------------------------------------------------------------------------------------------------------------------------------------------------------------------------|-------------------------------------------------------------------------------------------------------------------------------------------------------|
| <b>World Health Organisation</b><br>(emphasis on developing countries) <sup>1</sup> | Acute MI<br>Revascularisation procedures<br>Hospitalisation for unstable angina<br>Cardiomyopathy<br>Rheumatic and congenital heart disease<br>Chronic IHD patients commencing an exercise program | <b>Basic facility:</b><br>Community health worker (preferably health professional)<br><br><b>Intermediate facility:</b><br>Physician (trained in cardiology, exercise physiology & testing, cardiac rehabilitation)<br><br>Nurse/allied health professional (exercise | Medical & cardiac history<br>Risk factor assessment<br>Physical examination<br>Exercise & functional assessment | <b>Supervision</b><br>Close medical supervision recommended for medically complex patients with low functionality, however low-intensity, non-equipment based programs can also be utilised with minimal supervision | Heart disease education<br>Risk factor management<br>Nutritional education<br>Smoking cessation<br>Vocational counselling<br>Medication adherence<br>Physical activity counselling | Long-term programs recommended for all, to assist with retaining and reinforcing learned behaviours and providing motivation towards further progress |

specialist, physical  
therapist, dietician)

**Advanced facility:**

Cardiologist  
Physical therapist  
Exercise physiologist  
Psychologist  
Dietician/nutritionist  
Occupational  
therapist/vocational  
counsellor

**Americas**

|                              |                       |                        |                       |                                 |                        |                          |
|------------------------------|-----------------------|------------------------|-----------------------|---------------------------------|------------------------|--------------------------|
| <b>Canada</b>                | Acute MI              | <b>Medical</b>         | Medical & cardiac     | <b>Staff: patient ratio</b> 1:5 | Risk factor management | Availability of          |
| (Canadian Association        | Revascularisation     | Medical director       | history               | for early post-discharge        | Psychological          | maintenance programs     |
| of Cardiac                   | procedures            | (physician)            | Current symptoms      | programs, with second           | evaluation, education  | provided by hospitals or |
| Rehabilitation) <sup>2</sup> | Stable angina         | Nurse                  | Assessment of cardiac | staff member available          | and counselling        | community-based,         |
|                              | Hospitalisation for   |                        | risk factors          | for emergencies                 | Nutritional education  | allowing for continued   |
|                              | unstable angina       | <b>Allied health</b>   | Medication review     | 1:15 for intermediate           | Smoking cessation      | participation in a       |
|                              | Chronic heart failure | Health educator        | Physical examination  | and maintenance                 | Physical activity      | structured program       |
|                              | Cardiac valve surgery | Exercise physiologist/ | and blood profile     | programs that do not use        | counselling            |                          |

|                         |                                         |                                       |                |                        |
|-------------------------|-----------------------------------------|---------------------------------------|----------------|------------------------|
| Cardiac transplantation | physiotherapist                         | Resting ECG                           | continuous ECG | Vocational counselling |
| ICD insertion           | Dietician                               | Assessment of physical activity level | monitoring     | Medication adherence   |
|                         | Psychologist/social worker/psychiatrist | Exercise & functional assessment      |                | Stress management      |
|                         | Occupational therapist                  |                                       |                |                        |
|                         | Pharmacist                              |                                       |                |                        |

|                                                                                                                             |                                      |                                    |                                    |                                                                                                  |                                                   |                                                                                                                    |
|-----------------------------------------------------------------------------------------------------------------------------|--------------------------------------|------------------------------------|------------------------------------|--------------------------------------------------------------------------------------------------|---------------------------------------------------|--------------------------------------------------------------------------------------------------------------------|
| <b>South America</b>                                                                                                        | Acute MI                             | <b>Medical</b>                     | Medical & cardiac                  | <b>Supervision</b>                                                                               | Risk factor management                            | Aerobic training should                                                                                            |
| (South American Society of Cardiology, Inter-American Committee of Cardiovascular Prevention & Rehabilitation) <sup>3</sup> | Revascularisation procedures         | Cardiologist or exercise physician | history                            | Low risk patients -direct supervision for minimum of 6-18 sessions with gradual reduction        | Psychological evaluation, education & counselling | be performed at 70-90% or HR <sub>max</sub> (determined by stress test) or 50-80% of HRR.                          |
|                                                                                                                             | Stable angina                        | Nurse                              | Assessment of cardiac risk factors | Moderate risk patients - direct supervision for minimum of 12-24 sessions with gradual reduction | Nutritional education                             | Resistance training performed in sets of 8-15 repetitions.                                                         |
|                                                                                                                             | Chronic heart failure                |                                    | Medication information             | Greater supervision required for high risk patients                                              | Smoking cessation                                 | Training program should last for 40-60 minutes on at least three days/week supplemented by daily physical activity |
|                                                                                                                             | Cardiac valve surgery                | <b>Allied health</b>               | Physical examination               |                                                                                                  | Physical activity counselling                     |                                                                                                                    |
|                                                                                                                             | Cardiac transplantation              | Physiotherapist                    | Exercise & functional assessment   |                                                                                                  | Stress management                                 |                                                                                                                    |
|                                                                                                                             | Peripheral artery disease            | Psychologist                       |                                    |                                                                                                  |                                                   |                                                                                                                    |
|                                                                                                                             | Asymptomatic coronary artery disease | Nutritionist                       |                                    |                                                                                                  |                                                   |                                                                                                                    |
|                                                                                                                             | Patients at high CVD risk            | Social worker                      |                                    |                                                                                                  |                                                   |                                                                                                                    |

|                                                                                                                |                              |                                               |                                               |                                                 |                                                     |                                                    |
|----------------------------------------------------------------------------------------------------------------|------------------------------|-----------------------------------------------|-----------------------------------------------|-------------------------------------------------|-----------------------------------------------------|----------------------------------------------------|
| <b>United States</b>                                                                                           | Acute MI                     | <b>Medical</b>                                | Medical & cardiac                             | <b>Prescription</b>                             | Risk factor management                              | Follow-up program                                  |
| (American Heart Association, American Association of Cardiovascular & Pulmonary Rehabilitation) <sup>4,5</sup> | Revascularisation procedures | Medical director<br>Registered nurse          | history<br>Assessment of cardiac risk factors | Physician (Medicare requirement)                | Psychological evaluation, education and counselling | structured around individual exercise prescription |
|                                                                                                                | Stable angina                | <b>Allied health</b>                          | Current symptoms                              | <b>Supervision</b>                              | Nutritional education                               | Identification of                                  |
|                                                                                                                | Cardiac valve surgery        | Exercise physiologist/<br>exercise specialist | Presence of comorbidities                     | Low risk patients -direct supervision for       | Smoking cessation                                   | community-based programs.                          |
|                                                                                                                | Cardiac transplantation      | Physical therapist                            | Physical examination                          | minimum of 6-18 sessions.                       | Physical activity counselling                       |                                                    |
|                                                                                                                |                              | Mental health professional                    | Resting ECG                                   | Moderate risk patients - direct supervision for | Vocational counselling                              |                                                    |
|                                                                                                                |                              | Dietician                                     | Exercise & functional assessment              | minimum of 12-24 sessions.                      |                                                     |                                                    |
|                                                                                                                |                              | Occupational therapist                        |                                               | High risk patients -direct supervision for      |                                                     |                                                    |
|                                                                                                                |                              | Health educator                               |                                               | minimum of 18-36 sessions.                      |                                                     |                                                    |
|                                                                                                                |                              | Vocational counsellor                         |                                               |                                                 |                                                     |                                                    |

## Asia

|                                             |                              |                                             |                             |                                           |                                     |                                          |
|---------------------------------------------|------------------------------|---------------------------------------------|-----------------------------|-------------------------------------------|-------------------------------------|------------------------------------------|
| <b>Japan</b>                                | Acute MI                     | <b>Medical</b>                              | Medical & cardiac           | <b>Staff: patient ratio</b>               | Risk factor management              | Recommended to                           |
| (Japanese Circulation Society) <sup>6</sup> | Revascularisation procedures | Certified cardiac rehabilitation specialist | history<br>Current symptoms | 1:20 for sessions conducted by physician. | Psychological evaluation, education | maintain exercise at anaerobic threshold |

|                           |                                       |                                      |                                                     |                       |
|---------------------------|---------------------------------------|--------------------------------------|-----------------------------------------------------|-----------------------|
| Stable angina             | Nurse                                 | Physical examination & blood profile | 1:8 for sessions led by a physiotherapist or nurse. | and counselling       |
| Chronic heart failure     |                                       |                                      |                                                     | Nutritional education |
| Cardiac transplantation   | <b>Allied health</b>                  | Resting ECG                          |                                                     | Smoking cessation     |
| Peripheral artery disease | Physical therapist                    | Exercise & functional assessment     |                                                     | Stress management     |
|                           | Health & fitness programmer           |                                      |                                                     |                       |
|                           | Clinical psychotherapist (consultant) |                                      |                                                     |                       |
|                           | Dietician                             |                                      |                                                     |                       |
|                           | Occupational therapist                |                                      |                                                     |                       |
|                           | Pharmacist (consultant)               |                                      |                                                     |                       |

### Australasia

|                                                                                                                         |                                     |                        |                                           |                                                          |                                                   |                                                                                                     |
|-------------------------------------------------------------------------------------------------------------------------|-------------------------------------|------------------------|-------------------------------------------|----------------------------------------------------------|---------------------------------------------------|-----------------------------------------------------------------------------------------------------|
| <b>Australia</b>                                                                                                        | Acute MI                            | <b>Medical</b>         | Medical & cardiac history                 | <b>Prescription</b>                                      | Heart disease education                           | Encouraged to maintain regular physical activity and ongoing maintenance of other lifestyle changes |
| (National Heart Foundation of Australia, Australian Cardiovascular Health & Rehabilitation Association) <sup>7-14</sup> | Revascularisation procedures        | Physician              | Assessment of cardiac risk factors        | Exercise physiologist or physiotherapist (NSW, SA, VIC). | Risk factor management                            |                                                                                                     |
|                                                                                                                         | Stable angina                       | Nurse                  | Medication review                         |                                                          | Psychological evaluation, education & counselling |                                                                                                     |
|                                                                                                                         | Hospitalisation for unstable angina | <b>Allied health</b>   | Physical examination (NSW, QLD, VIC only) | <b>Supervision</b>                                       | Nutritional education                             | Referred to community based maintenance programs where available                                    |
|                                                                                                                         | Chronic heart failure               | Exercise physiologist  | Blood profile                             | Health professional                                      | Smoking cessation                                 |                                                                                                     |
|                                                                                                                         | Cardiac valve surgery               | Psychologist           | Resting ECG (NSW,                         | <b>Staff: patient ratio</b>                              | Physical activity counselling                     |                                                                                                     |
|                                                                                                                         | Cardiac transplantation             | Dietician/nutritionist |                                           |                                                          |                                                   |                                                                                                     |

|                                      |                                                   |                                  |                                                                                                              |                                   |
|--------------------------------------|---------------------------------------------------|----------------------------------|--------------------------------------------------------------------------------------------------------------|-----------------------------------|
| Pacemaker/ICD insertion              | Occupational therapist                            | VIC only)                        | 1:10 for low-intensity program, second staff member required for moderate-intensity program or larger groups | Vocational counselling (QLD, VIC) |
| Cardiomyopathy                       | Pharmacist                                        | Exercise & functional assessment |                                                                                                              | Stress management (QLD, VIC, WA)  |
| Atrial fibrillation                  | Indigenous health worker (Aboriginal communities) |                                  |                                                                                                              |                                   |
| High risk of coronary artery disease |                                                   |                                  |                                                                                                              |                                   |
| Other vascular or heart disease      | Diabetes educator (SA, VIC only)                  |                                  |                                                                                                              |                                   |
|                                      | Vocational counsellor (VIC only)                  |                                  |                                                                                                              |                                   |

|                                                                                                              |                                     |                         |                                  |                                                                                                               |                                                     |                                                                                            |
|--------------------------------------------------------------------------------------------------------------|-------------------------------------|-------------------------|----------------------------------|---------------------------------------------------------------------------------------------------------------|-----------------------------------------------------|--------------------------------------------------------------------------------------------|
| <b>New Zealand</b><br>(New Zealand Guidelines Group, National Heart Foundation of New Zealand) <sup>15</sup> | Acute MI                            | <b>Medical</b>          | Medical & cardiac history        | <b>Supervision</b>                                                                                            | Heart disease education                             | Cardiac clubs and support group networks available throughout New Zealand.                 |
|                                                                                                              | Revascularisation procedures        | Cardiologist/ physician | Exercise & functional assessment | Generally by physiotherapist, other staff should be trained in exercise prescription for cardiac populations. | Risk factor management                              |                                                                                            |
|                                                                                                              | Stable angina                       | Nurse                   |                                  |                                                                                                               | Psychological evaluation, education and counselling | Personal instruction & continued support, continue with low to moderate-intensity exercise |
|                                                                                                              | Hospitalisation for unstable angina | <b>Allied health</b>    |                                  |                                                                                                               | Nutritional education                               |                                                                                            |
|                                                                                                              | Cardiac valve surgery               | Physiotherapist         |                                  |                                                                                                               | Smoking cessation                                   |                                                                                            |
|                                                                                                              | Exercise physiologist               |                         |                                  |                                                                                                               | Physical activity counselling                       |                                                                                            |
|                                                                                                              | Psychologist                        |                         |                                  |                                                                                                               | Vocational counselling                              |                                                                                            |
|                                                                                                              | Dietician                           |                         |                                  |                                                                                                               | Stress management                                   |                                                                                            |
|                                                                                                              | Occupational therapist (consultant) |                         |                                  |                                                                                                               |                                                     |                                                                                            |

Social worker  
 Maori disease state  
 management nurse

**Europe**

|                                  |                           |                         |                        |                             |                        |                       |
|----------------------------------|---------------------------|-------------------------|------------------------|-----------------------------|------------------------|-----------------------|
| <b>Europe</b>                    | Acute MI                  | <b>Medical</b>          | Medical & cardiac      | <b>Staff: patient ratio</b> | Risk factor management | Encourage involvement |
| (European Association            | Revascularisation         | Cardiologist            | history                | Maximum of 1:10 with        | Psychological          | in enjoyable leisure  |
| of Cardiovascular                | procedures                | Nurse                   | Current symptoms       | two staff members           | evaluation, education  | activities and group  |
| Prevention &                     | Chronic heart failure     |                         | Physical examination   | present                     | and counselling        | exercise training     |
| Rehabilitation) <sup>16,17</sup> | Cardiac valve surgery     | <b>Allied health</b>    | and blood profile      |                             | Nutritional education  | programs              |
|                                  | Cardiac transplantation   | Physiotherapist         | Resting ECG            | Supervision/ monitoring     | Smoking cessation      |                       |
|                                  | Peripheral artery disease | Exercise physiologist   | Cardiac imaging        | prolonged with new          | Physical activity      |                       |
|                                  |                           | (consultant)            | Assessment of physical | signs and symptoms          | counselling            |                       |
|                                  |                           | Psychologist            | activity level         |                             | Vocational counselling |                       |
|                                  |                           | Dietician               | Exercise & functional  |                             |                        |                       |
|                                  |                           | Occupational therapist  | assessment             |                             |                        |                       |
|                                  |                           | (consultant)            |                        |                             |                        |                       |
|                                  |                           | Social worker           |                        |                             |                        |                       |
|                                  |                           | (consultant)            |                        |                             |                        |                       |
|                                  |                           | Pharmacist (consultant) |                        |                             |                        |                       |

|                |          |                |                   |                    |                         |                     |
|----------------|----------|----------------|-------------------|--------------------|-------------------------|---------------------|
| <b>Austria</b> | Acute MI | <b>Medical</b> | Medical & cardiac | <b>Supervision</b> | Heart disease education | Tailored home-based |
|----------------|----------|----------------|-------------------|--------------------|-------------------------|---------------------|

|                                          |                                                     |                                                                                                           |                                    |                                                                                |                                                   |                                                                                                   |
|------------------------------------------|-----------------------------------------------------|-----------------------------------------------------------------------------------------------------------|------------------------------------|--------------------------------------------------------------------------------|---------------------------------------------------|---------------------------------------------------------------------------------------------------|
| (Austrian Cardiac Society) <sup>18</sup> | Revascularisation procedures                        | Internal medicine and cardiology specialist                                                               | history                            | Sports scientist or physiotherapist (with a diploma in cardiac rehabilitation) | Risk factor management                            | training program designed by rehabilitation team and patient.                                     |
|                                          | Chronic heart failure                               | Nurse                                                                                                     | Assessment of cardiac risk factors |                                                                                | Psychological evaluation, education & counselling |                                                                                                   |
|                                          | Cardiac transplantation                             |                                                                                                           |                                    |                                                                                | Nutritional education                             |                                                                                                   |
|                                          | Pacemaker/ICD insertion                             | <b>Allied health</b><br>Physiotherapist or sports scientist or (with a diploma in cardiac rehabilitation) | Physical examination               | Resting ECG                                                                    | Smoking cessation                                 | Encouraged to join sports club or gym to increase physical activity and become involved in sports |
|                                          | Peripheral artery disease                           | scientist or (with a diploma in cardiac rehabilitation)                                                   | Exercise & functional assessment   |                                                                                | Stress management                                 |                                                                                                   |
|                                          | Stable coronary heart disease                       | Psychologist (with a diploma in cardiac rehabilitation)                                                   |                                    |                                                                                | Relaxation program                                |                                                                                                   |
|                                          | Other surgeries of the heart & big vessels          |                                                                                                           |                                    |                                                                                |                                                   |                                                                                                   |
|                                          | Pulmonary hypertension                              |                                                                                                           |                                    |                                                                                |                                                   |                                                                                                   |
|                                          | Electro-physiological intervention                  | Nutritionist<br>Social worker                                                                             |                                    |                                                                                |                                                   |                                                                                                   |
|                                          | Haemodynamically stable arrhythmia                  |                                                                                                           |                                    |                                                                                |                                                   |                                                                                                   |
|                                          | Sustained ventricular tachycardia or cardiac arrest |                                                                                                           |                                    |                                                                                |                                                   |                                                                                                   |

|                                       |                               |                                             |                              |                                              |                                         |                      |
|---------------------------------------|-------------------------------|---------------------------------------------|------------------------------|----------------------------------------------|-----------------------------------------|----------------------|
| <b>Belgium</b><br>(Belgian Society of | Acute MI<br>Revascularisation | <b>Medical</b><br>Cardiologist (specialised | Medical & cardiac<br>history | <b>Supervision</b><br>Cardiac rehabilitation | Risk factor management<br>Psychological | Not regulated by law |
|---------------------------------------|-------------------------------|---------------------------------------------|------------------------------|----------------------------------------------|-----------------------------------------|----------------------|

|                                  |                         |                            |                        |                         |                         |                         |
|----------------------------------|-------------------------|----------------------------|------------------------|-------------------------|-------------------------|-------------------------|
| Cardiology) <sup>19</sup>        | procedures              | in cardiac rehabilitation) | Current symptoms       | specialist must be      | evaluation, education   |                         |
|                                  | Cardiac valve surgery   |                            | Assessment of cardiac  | readily available if    | and counselling         |                         |
|                                  | Cardiac transplantation | <b>Allied health</b>       | risk factors           | required (constant      | Nutritional education   |                         |
|                                  | Cardiomyopathy with     | Physical therapist         | Medication information | medical supervision not | Smoking cessation       |                         |
|                                  | left ventricular        | Psychologist               | Physical examination   | essential)              | Vocational counselling  |                         |
|                                  | dysfunction             | Dietician (consultant)     | Exercise & functional  |                         | Stress management       |                         |
|                                  |                         | Occupational therapist     | assessment             |                         |                         |                         |
|                                  |                         | (consultant)               |                        |                         |                         |                         |
|                                  |                         | Social worker              |                        |                         |                         |                         |
| <b>England</b>                   | Acute MI                | Not reported               | Medical & cardiac      | Not reported            | Heart disease education | Support for long-term   |
| (Department of Health,           | Revascularisation       |                            | history                |                         | Risk factor management  | management of health,   |
| National Institute for           | procedures              |                            | Current symptoms       |                         | Psychological           | including community-    |
| Health & Care                    | Hospitalisation for     |                            | Assessment of cardiac  |                         | evaluation, education   | based programs, leisure |
| Excellence, National             | unstable angina         |                            | risk factors           |                         | and counselling         | centre membership       |
| Health Service) <sup>20-22</sup> | Chronic heart failure   |                            | Physical examination   |                         | Nutritional education   | schemes, and cardiac    |
|                                  | Cardiac valve surgery   |                            | and blood profile      |                         | Smoking cessation       | support groups          |
|                                  | Cardiac transplantation |                            | Resting ECG            |                         | Vocational counselling  |                         |
|                                  | Pacemaker/ICD           |                            | Assessment of physical |                         | Medication adherence    |                         |
|                                  | insertion               |                            | activity level         |                         | Physical activity       |                         |
|                                  | Confirmed diagnosis of  |                            | Exercise & functional  |                         | counselling             |                         |
|                                  | exertional angina       |                            | assessment             |                         | Stress management       |                         |

|                                                    |                                       |                                                               |                                  |                                                                       |                                                     |                                                                                   |
|----------------------------------------------------|---------------------------------------|---------------------------------------------------------------|----------------------------------|-----------------------------------------------------------------------|-----------------------------------------------------|-----------------------------------------------------------------------------------|
| <b>France</b>                                      | Acute MI                              | <b>Medical</b>                                                | Medical & cardiac                | <b>Supervision</b>                                                    | Heart disease education                             | Encouraged to maintain                                                            |
| (French Society of Cardiology) <sup>23</sup>       | Revascularisation procedures          | Cardiologist (preferably qualified in cardiac rehabilitation) | history<br>Physical examination  | Rehabilitation team, with cardiologist readily available if required. | Psychological evaluation, education and counselling | regular physical activity and ongoing maintenance of other                        |
|                                                    | Stable angina                         | Physical & rehabilitation medicine physician                  | Resting ECG<br>Cardiac imaging   |                                                                       | Nutritional education                               | lifestyle changes                                                                 |
|                                                    | Chronic heart failure                 | Nurse                                                         | Exercise & functional assessment |                                                                       | Smoking cessation                                   | Availability of Heart and Health Clubs run by the French Federation of Cardiology |
|                                                    | Cardiac valve surgery                 | Pneumologist                                                  |                                  |                                                                       |                                                     |                                                                                   |
|                                                    | Cardiac transplantation               | <b>Allied health</b>                                          |                                  |                                                                       |                                                     |                                                                                   |
|                                                    | Pacemaker/ICD insertion               | Psychologist (consultant)                                     |                                  |                                                                       |                                                     |                                                                                   |
|                                                    | Peripheral artery disease             | Dietician                                                     |                                  |                                                                       |                                                     |                                                                                   |
|                                                    | Thoracic aorta surgery                | Occupational therapist                                        |                                  |                                                                       |                                                     |                                                                                   |
|                                                    | Ventricular assist device             | Social worker                                                 |                                  |                                                                       |                                                     |                                                                                   |
|                                                    | Congenital cardiopathies in adulthood | Psychiatrist                                                  |                                  |                                                                       |                                                     |                                                                                   |
|                                                    | High cardiovascular risk              |                                                               |                                  |                                                                       |                                                     |                                                                                   |
| <b>Germany</b>                                     | Acute MI                              | <b>Medical</b>                                                | Medical & cardiac                | <b>Supervision</b>                                                    | Psychological                                       | Options include                                                                   |
| (German Federation for Cardiovascular Prevention & | Revascularisation procedures          | Cardiologist<br>Physician                                     | history<br>Physical examination  | Exercise therapist                                                    | evaluation, education and counselling               | receiving further intensive rehabilitative                                        |
|                                                    | Chronic heart failure                 | Nurse                                                         | Resting ECG                      |                                                                       | Nutritional education                               | treatment funded by                                                               |

|                                  |                         |                      |                       |  |                   |                           |
|----------------------------------|-------------------------|----------------------|-----------------------|--|-------------------|---------------------------|
| Rehabilitation) <sup>24,25</sup> | Cardiac valve surgery   |                      | Cardiac imaging       |  | Smoking cessation | retirement insurance,     |
|                                  | Cardiac transplantation | <b>Allied health</b> | Exercise & functional |  | Stress management | with a focus on return to |
|                                  | Pacemaker/ICD           | Physiotherapist      | assessment            |  |                   | employment                |
|                                  | insertion               | Exercise therapist   |                       |  |                   | Community based heart     |
|                                  | Unstable                | Psychologist         |                       |  |                   | groups promoting          |
|                                  | myocardiopathy          | Nutritionist         |                       |  |                   | physical activity,        |
|                                  | Social worker           |                      |                       |  | education and     | psychosocial elements     |
|                                  |                         |                      |                       |  |                   | are also available        |

|                                                                                  |                           |                         |                       |                            |                         |                           |
|----------------------------------------------------------------------------------|---------------------------|-------------------------|-----------------------|----------------------------|-------------------------|---------------------------|
| <b>Ireland</b><br>(Irish Association of<br>Cardiac Rehabilitation) <sup>26</sup> | Acute MI                  | <b>Medical</b>          | Assessment of cardiac | <b>Supervision</b>         | Heart disease education | Exercise programs         |
|                                                                                  | Revascularisation         | Cardiologist/ physician | risk factors          | Low risk patients -direct  | Risk factor management  | organised by Phase IV     |
|                                                                                  | procedures                | Nurse                   | Exercise & functional | supervision for            | Psychological           | qualified gym instructors |
|                                                                                  | Stable angina             |                         | assessment            | minimum of 6-18            | evaluation, education   | in community gyms         |
|                                                                                  | Chronic heart failure     | <b>Allied health</b>    |                       | sessions.                  | and counselling         |                           |
|                                                                                  | Cardiac valve surgery     | Physiotherapist         |                       | Moderate risk patients -   | Nutritional education   |                           |
|                                                                                  | Cardiac transplantation   | Psychologist            |                       | direct supervision for     | Smoking cessation       |                           |
|                                                                                  | Pacemaker/ICD             | Dietician               |                       | minimum of 12-24           | Physical activity       |                           |
|                                                                                  | insertion                 | Occupational therapist  |                       | sessions.                  | counselling             |                           |
|                                                                                  | Peripheral artery disease | Social worker           |                       | High risk patients -direct | Vocational counselling  |                           |
|                                                                                  | Cardiomyopathy            | Pharmacist              |                       | supervision for            | Stress management       |                           |
|                                                                                  | Post cerebral vascular    | Vocational and smoking  |                       | minimum of 18-36           | Relaxation program      |                           |

disease cessation counsellors sessions.

At risk of coronary artery disease

**Staff: patient ratio**

Minimum of 1:5

**Netherlands**  
(Royal Dutch Society for Physical Therapy)<sup>27,28</sup>

Acute MI  
Revascularisation procedures  
Stable angina  
Hospitalisation for unstable angina  
Chronic heart failure  
Cardiac valve surgery

**Medical**  
Rehabilitation coordinator  
Cardiologist (cardiac rehabilitation specialist)  
Nurse

**Allied health**  
Physical therapist  
Psychologist  
Dietician  
Social worker  
Other professionals as required

Medical & cardiac history  
Current symptoms  
Presence of comorbidities  
Medication information  
Physical examination  
Assessment of physical activity level  
Exercise & functional assessment

**Supervision**  
Physiotherapist, with physician available on call if not present on-site

**Staff: patient ratio**  
Minimum of 1:5 for complex conditions

Heart disease education  
Risk factor management  
Psychological evaluation, education & counselling  
Vocational counselling  
Relaxation program

Maintain physical activity through home walking program, use of regular sports facilities or attendance at certified exercise facilities

**Northern Ireland**  
(Clinical Resource

Acute MI  
Revascularisation

**Medical**  
Nurse

Assessment of cardiac risk factors

**Supervision**  
Staff member with

Risk factor management  
Psychological

Provision of regular supervised training

|                                                                                |                              |                       |                                  |                                                          |                                                     |                                                                                                                     |
|--------------------------------------------------------------------------------|------------------------------|-----------------------|----------------------------------|----------------------------------------------------------|-----------------------------------------------------|---------------------------------------------------------------------------------------------------------------------|
| Efficiency Support Team) <sup>29</sup>                                         | procedures                   |                       | Exercise & functional assessment | training in exercise physiology and prescription         | evaluation, education and counselling               | sessions                                                                                                            |
|                                                                                | Stable angina                | <b>Allied health</b>  |                                  |                                                          |                                                     | Individualised exercise prescriptions provided                                                                      |
|                                                                                | Chronic heart failure        | Physiotherapist       |                                  |                                                          | Nutritional education                               | for individual home-based training.                                                                                 |
|                                                                                |                              | Clinical psychologist |                                  |                                                          | Smoking cessation                                   |                                                                                                                     |
|                                                                                |                              | Dietician             |                                  | <b>Staff: patient ratio</b>                              | Vocational counselling                              |                                                                                                                     |
|                                                                                |                              | Pharmacist            |                                  | Maximum of 1:5 with 2 trained staff present at all times |                                                     |                                                                                                                     |
| <b>Scotland</b><br>(Scottish Intercollegiate Guidelines Network) <sup>30</sup> | Acute MI                     | <b>Medical</b>        | Medical & cardiac history        | <b>Staff: patient ratio</b>                              | Heart disease education                             | Maintain regular low- to moderate-intensity aerobic exercise 3-5 times per week                                     |
|                                                                                | Revascularisation procedures | Nurse                 | Physical examination             | No less than 1:10                                        | Psychological evaluation, education and counselling |                                                                                                                     |
|                                                                                | Stable angina                | <b>Allied health</b>  | Resting ECG                      |                                                          |                                                     | Maintenance exercise programs are available and should be conducted by registered and qualified fitness instructors |
|                                                                                | Chronic heart failure        | Physiotherapist       | Exercise & functional assessment |                                                          | Nutritional education                               |                                                                                                                     |
|                                                                                |                              | Psychologist          |                                  |                                                          | Smoking cessation                                   |                                                                                                                     |
|                                                                                |                              | Dietician             |                                  |                                                          |                                                     |                                                                                                                     |
|                                                                                |                              | Pharmacist            |                                  |                                                          |                                                     |                                                                                                                     |
| <b>United Kingdom</b><br>(Association of                                       | Acute MI                     | <b>Medical</b>        | Medical & cardiac history        | <b>Supervision</b>                                       | Heart disease education                             | Patients provided with advice for their long-                                                                       |
|                                                                                | Revascularisation            | Cardiologist          |                                  | Physiotherapist, sports                                  | Risk factor management                              |                                                                                                                     |

|                                      |                           |                            |                        |                             |                        |                            |
|--------------------------------------|---------------------------|----------------------------|------------------------|-----------------------------|------------------------|----------------------------|
| Chartered                            | procedures                | Nurse                      | Assessment of cardiac  | scientist, exercise         | Psychological          | term exercise              |
| Physiotherapists in                  | Stable angina             |                            | risk factors           | physiologist, or            | evaluation, education  | prescription and how to    |
| Cardiac Rehabilitation,              | Chronic heart failure     | <b>Allied health</b>       | Current symptoms       | exercise/fitness            | and counselling        | modify it, as well as      |
| British Association for              | Cardiac valve surgery     | Physiotherapist            | Presence of            | instructor with cardiac     | Nutritional education  | information on             |
| Cardiovascular                       | Cardiac transplantation   | Exercise specialist        | comorbidities          | disease rehabilitation      | Smoking cessation      | appropriate local          |
| Prevention &                         | Pacemaker/ICD             | Psychologist               | Medication information | qualification               | Physical activity      | exercise classes and gym   |
| Rehabilitation) <sup>31,32</sup>     | insertion                 | Dietician                  | Physical examination & |                             | counselling            | programs, home exercise    |
|                                      | Peripheral artery disease | Occupational therapist     | blood profile          | <b>Staff: patient ratio</b> | Vocational counselling | or walking plans.          |
|                                      | Ventricular assist        |                            | Exercise & functional  | Minimum of 1:5 during       |                        | Patients transferred to an |
|                                      | devices                   |                            | assessment             | early rehabilitation,       |                        | appropriately qualified    |
|                                      | Grown-up congenital       |                            |                        | decreasing as patients      |                        | exercise professional      |
|                                      | heart disease             |                            |                        | become more                 |                        | specialising in            |
|                                      | Other atherosclerotic     |                            |                        | independent, with           |                        | cardiovascular             |
|                                      | diseases (e.g. transient  |                            |                        | minimum of one              |                        | prevention and             |
|                                      | ischaemic attack)         |                            |                        | qualified staff member      |                        | rehabilitation             |
|                                      |                           |                            |                        | (two for early              |                        |                            |
|                                      |                           |                            |                        | rehabilitation)             |                        |                            |
| <b>Wales</b>                         | Acute MI                  | <b>Medical</b>             | Medical & cardiac      | <b>Staff: patient ratio</b> | Risk factor management | Choice of individualised   |
| (Welsh Assembly                      | Revascularisation         | Cardiologist (or           | history                | 1:5 for community based     | Psychological          | self-directed program or   |
| Government, Aneurin                  | procedures                | physician with interest    | Assessment of cardiac  | programs                    | evaluation, education  | supervised Phase IV        |
| Bevan Health Board) <sup>33,34</sup> | Stable angina             | in cardiac rehabilitation) | risk factors           |                             | and counselling        | program with long term     |

|                          |                        |                       |                           |                        |                         |
|--------------------------|------------------------|-----------------------|---------------------------|------------------------|-------------------------|
| Chronic heart failure    | Nurse                  | Current symptoms      | Generally hospital-based  | Vocational counselling | review by primary care. |
| Cardiac valve surgery    |                        | Medication review     | programs are for those    | Stress management      | Option to “self-refer”  |
| Cardiac transplantation  | <b>Allied health</b>   | Exercise & functional | patients requiring higher |                        | back to Phase III if    |
| Pacemaker/ICD            | Physiotherapist        | assessment            | supervision, while those  |                        | required                |
| insertion                | Exercise instructor    |                       | located in the            |                        |                         |
| Congenital heart disease | Clinical psychologist  |                       | community are for lower   |                        |                         |
|                          | Dietician              |                       | risk patients.            |                        |                         |
|                          | Occupational therapist |                       |                           |                        |                         |
|                          | Pharmacist             |                       |                           |                        |                         |

---

Abbreviations: MI, myocardial infarction; IHD, ischaemic heart disease; ICD, implantable cardioverter-defibrillator; ECG, electrocardiogram; CVD; cardiovascular disease; HR<sub>max</sub>, maximum heart rate; HRR, heart rate reserve; SA, South Australia (Australian state); VIC, Victoria (Australian state); NSW, New South Wales (Australian state); QLD, Queensland (Australian state); WA, Western Australia (Australian state).

## References

1. World Health Organization Expert Committee. Rehabilitation after cardiovascular diseases, with special emphasis on developing countries. *World Health Organ Tech Rep Ser.* 1993; 831: 1-122.
2. Stone JA, Arthur HM, Suskin N, et al. *Canadian guidelines for cardiac rehabilitation and cardiovascular disease prevention: Translating knowledge into action.* 3rd ed. Winnipeg, Canada: Canadian Association of Cardiac Rehabilitation, 2009.
3. Herdy AH, Lopez-Jimenez F, Terzic CP, et al. South American guidelines for cardiovascular disease prevention and rehabilitation. *Arq Bras Cardiol.* 2014; 103: 1-31.
4. American Association of Cardiovascular and Pulmonary Rehabilitation. *Guidelines for cardiac rehabilitation and secondary prevention programs.* 5th ed. Champaign, IL: Human Kinetics, 2013.
5. Balady GJ, Williams MA, Ades PA, et al. Core components of cardiac rehabilitation/secondary prevention programs: 2007 update: a scientific statement from the American Heart Association Exercise, Cardiac Rehabilitation, and Prevention Committee, the Council on Clinical Cardiology; the Councils on Cardiovascular Nursing, Epidemiology and Prevention, and Nutrition, Physical Activity, and Metabolism; and the American Association of Cardiovascular and Pulmonary Rehabilitation. *Circulation.* 2007; 115: 2675-82.
6. Japanese Circulation Society Joint Working Group. Guidelines for rehabilitation in patients with cardiovascular disease (JCS 2012). *Circ J.* 2014; 78: 2022-93.
7. National Heart Foundation of Australia and Australian Cardiac Rehabilitation Association. *Recommended framework for cardiac rehabilitation.* Australia: National Heart Foundation of Australia, <http://www.heartfoundation.org.au/SiteCollectionDocuments/Recommended-framework.pdf> (2004, accessed 11 February 2015).
8. Woodruffe S, Neubeck L, Clark RA, et al. Australian Cardiovascular Health and Rehabilitation Association (ACRA) core components of cardiovascular disease secondary prevention and cardiac rehabilitation 2014. *Heart Lung Circ.* 2015; 24: 430-41.
9. Connors C, Boyd J, Kasteel L, et al. *Cardiac rehabilitation and secondary prevention: A framework for the Northern Territory.* Casuarina, Australia: Northern Territory Government Department of Health, <http://digitallibrary.health.nt.gov.au/prodjspsui/bitstream/10137/610/9/NT%20Cardiac%20Secondary%20Prevention%20Framework.pdf> (2012, accessed 22 March 2015).
10. Department of Health Western Australia. *Cardiovascular rehabilitation and secondary prevention pathway principles for Western Australia.* Perth: Health Strategy and Networks, Department of Health, Western Australia, [http://www.healthnetworks.health.wa.gov.au/docs/1405\\_CRSP\\_Pathway\\_Principles\\_WA.pdf](http://www.healthnetworks.health.wa.gov.au/docs/1405_CRSP_Pathway_Principles_WA.pdf) (2014, accessed 30 March 2015).
11. Goble AJ and Worcester MUC. *Best practice guidelines for cardiac rehabilitation and secondary prevention.* Carlton, Australia: Department of Human Services Victoria, <http://www.health.vic.gov.au/nhpa/downloads/bestpracticecardiacrehab.pdf>. (1999, accessed 10 March 2015).
12. Heart Foundation (SA Division). *Cardiac rehabilitation: A model of care for South Australia - Stage 1.* Adelaide: South Australia Department of Health, <http://www.sahealth.sa.gov.au/wps/wcm/connect/public+content/sa+health+internet/health+reform/clinical+networks/cardiology+clinical+network/model+of+care+for+cardiac+rehabilitation> (2011, accessed 10 March 2015).
13. Queensland Health. *Best practice guidelines: Outpatient cardiac rehabilitation.* Brisbane, Australia: Queensland Health, [https://www.health.qld.gov.au/publications/best\\_practice/9115cardiac\\_doc.pdf](https://www.health.qld.gov.au/publications/best_practice/9115cardiac_doc.pdf) (2003, accessed 10 March 2015).
14. NSW Department of Health. *NSW Chronic Care Program: Implementing rehabilitation for chronic disease - volume 2.* Sydney: NSW Department of Health, [http://www0.health.nsw.gov.au/policies/gl/2006/pdf/GL2006\\_022.pdf](http://www0.health.nsw.gov.au/policies/gl/2006/pdf/GL2006_022.pdf) (2006, accessed 17 March 2015).
15. Heart Foundation and New Zealand Guidelines Group. *Evidence-based best practice guideline: Cardiac rehabilitation.* Wellington: New Zealand Guideline Group, <http://www.health.govt.nz/publication/cardiac-rehabilitation-guideline> (2002, accessed 2 March 2015).

16. Piepoli MF, Corra U, Benzer W, et al. Secondary prevention through cardiac rehabilitation: from knowledge to implementation. A position paper from the Cardiac Rehabilitation Section of the European Association of Cardiovascular Prevention and Rehabilitation. *Eur J Cardiovasc Prev Rehabil*. 2010; 17: 1-17.
17. Piepoli MF, Corra U, Benzer W, et al. Secondary prevention through cardiac rehabilitation: physical activity counselling and exercise training: Key components of the position paper from the Cardiac Rehabilitation Section of the European Association of Cardiovascular Prevention and Rehabilitation. *Eur Heart J Suppl*. 2010; 31: 1967-74.
18. Niebauer J, Mayr K, Tschentscher M, Pokan R and Benzer W. Outpatient cardiac rehabilitation: the Austrian model. *Eur J Prev Cardiol*. 2013; 20: 468-79.
19. Dendale P, Dereppe H, Sutter JD, et al. Position paper of the Belgian Working Group on Cardiovascular Prevention and Rehabilitation: cardiovascular rehabilitation. *Acta Cardiol*. 2008; 63: 673-81.
20. National Institute for Health and Care Excellence. *Cardiac rehabilitation services commissioning guide*. London: National Institute for Health and Care Excellence, <https://www.nice.org.uk/guidance/cmg40> (2013, accessed 3 July 2015).
21. Strategic Commissioning Development Unit. *Service specification for cardiac rehabilitation services*. London: Department of Health England, [http://webarchive.nationalarchives.gov.uk/20130107105354/http://www.dh.gov.uk/en/Publicationsandstatistics/Publications/PublicationsPolicyAndGuidance/Browsable/DH\\_117507](http://webarchive.nationalarchives.gov.uk/20130107105354/http://www.dh.gov.uk/en/Publicationsandstatistics/Publications/PublicationsPolicyAndGuidance/Browsable/DH_117507) (2010, accessed 3 July 2015).
22. National Health Service. *National Service Framework for coronary heart disease: Modern standards & service models*. London: Department of Health UK, <https://www.gov.uk/government/publications/quality-standards-for-coronary-heart-disease-care> (2000, accessed 3 July 2015).
23. Pavy B, Iliou MC, Verges-Patois B, et al. French Society of Cardiology guidelines for cardiac rehabilitation in adults. *Arch Cardiovasc Dis*. 2012; 105: 309-28.
24. Karoff M, Held K and Bjarnason-Wehrens B. Cardiac rehabilitation in Germany. *Eur J Cardiovasc Prev Rehabil*. 2007; 14: 18-27.
25. Bjarnason-Wehrens B, Mayer-Berger W, Meister ER, Baum K, Hambrecht R and Gielen S. Recommendations for resistance exercise in cardiac rehabilitation. Recommendations of the German Federation for Cardiovascular Prevention and Rehabilitation. *Eur J Cardiovasc Prev Rehabil*. 2004; 11: 352-61.
26. McCreery C, Cradock K, Fallon N, O Doherty V and Kingston C. *Cardiac rehabilitation guidelines 2013*. Dublin: Irish Association of Cardiac Rehabilitation, <http://www.iacr.info/about/guidelines/> (2013, accessed 24 March 2015).
27. Achttien RJ, Staal JB, van der Voort S, et al. Exercise-based cardiac rehabilitation in patients with coronary heart disease: a practice guideline. *Neth Heart J*. 2013; 21: 429-38.
28. Royal Dutch Society for Physical Therapy. KNGF clinical practice guideline for physical therapy in patients undergoing cardiac rehabilitation. *Dutch J Phys Ther*. 2011; 121: 1-47.
29. McVeigh G, Bleakney G, Cupples M, et al. *Guidelines for cardiac rehabilitation in Northern Ireland*. Belfast: Clinical Resource Efficiency Support Team, <http://www.gain-ni.org/index.php/guidelines-for-cardiac-rehabilitation-in-northern-ireland> (2006, accessed 12 March 2015).
30. Scottish Intercollegiate Guidelines Network. *Cardiac rehabilitation: A national clinical guideline*. Edinburgh, Scotland: Scottish Intercollegiate Guidelines Network, <http://www.sign.ac.uk/guidelines/fulltext/57/index.html> (2002, accessed 11 February, 2015).
31. Probert H, Barritt H, Breen S, et al. *Standards for physical activity and exercise in the cardiovascular population*. 3rd ed.: Association of Chartered Physiotherapists in Cardiac Rehabilitation, <http://acpicr.com/sites/default/files/ACPICR%20Standards%202015.pdf> (2015, accessed 7 March 2015).
32. British Association for Cardiovascular Prevention and Rehabilitation. *The BACPR standards and core components for cardiovascular disease prevention and rehabilitation 2012*. 2nd ed. London: British Cardiovascular Society, [http://www.bacpr.com/resources/46C\\_BACPR\\_Standards\\_and\\_Core\\_Components\\_2012.pdf](http://www.bacpr.com/resources/46C_BACPR_Standards_and_Core_Components_2012.pdf) (2012, accessed 8 April 2015)..
33. Aneurin Bevan Health Board. *Cardiac rehabilitation service protocol*. Aneurin Bevan Health Board, <http://www.wales.nhs.uk/sitesplus/documents/986/AB%20HB%20CR%20Service%20Protocol%20-%20040211.pdf> (Accessed 22 March 2015).

34. Welsh Assembly Government. *The cardiac disease national service framework for Wales*. Cardiff: Welsh Assembly Government, <http://gov.wales/docs/dhss/publications/090706cardiacNSFen.pdf> (2009, accessed 12 March 2015).
